# Supplementary material for: Improving the photocatalytic reduction of CO2to CO for TiO2hollow spheres through hybridization with a cobalt complex
Source: Royal Society of Chemistry journal article supplement (doi:10.1039/c8ra03211d), 2018-01-01
Supplement: c8ra03211d1.pdf [file c8ra03211d1.pdf]

## Supporting Information

### Improving the Photocatalytic Reduction of CO<sub>2</sub> to CO for TiO<sub>2</sub> Hollow Sphere through Hybridization with Cobalt Complex

Jinliang Lin<sup>a\*</sup>, Xiaoxiang Sun<sup>b</sup>, Biao Qin<sup>a</sup> and Ting Yu<sup>a</sup>

<sup>a</sup> Department of Chemical and Engineering, Zunyi Normal College, 563000, Zunyi, P.R. China.

<sup>b</sup> Department of Chemical and Engineering, Qiannan Normal University for Nationalities, 558000, Duyun, P.R. China.

Email: jinliang\_lin@163.com

#### Contents

Fig. S1 SEM images of bTiO<sub>2</sub> and Energy-dispersive X-ray spectroscopy (EDS) of the as-prepared bTiO<sub>2</sub>.

Fig. S2 Mapping of the as-prepared bTiO<sub>2</sub>.

Fig. S3 SEM images of sTiO<sub>2</sub> and Energy-dispersive X-ray spectroscopy (EDS) of the as-prepared sTiO<sub>2</sub>.

Fig. S4 Mapping of the as-prepared sTiO<sub>2</sub>.

Fig. S5 SEM images of sTiO<sub>2</sub> sample after reaction and Energy-dispersive X-ray spectroscopy (EDS) of the as-prepared sTiO<sub>2</sub> sample after reaction.

Fig. S6 Mapping of the as-prepared sTiO<sub>2</sub> sample after reaction.

Table S1 Element contents in bTiO<sub>2</sub> sample.

Table S2 Element contents in sTiO<sub>2</sub> sample.

Table S3 Element contents in sTiO<sub>2</sub> sample after reaction.

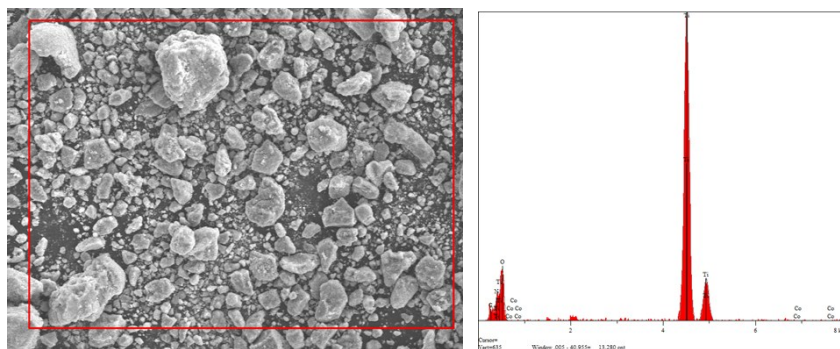

Fig. S1 SEM images of bTiO<sub>2</sub>(left) and Energy-dispersive X-ray spectroscopy (EDS) of the as-prepared bTiO<sub>2</sub>(right).

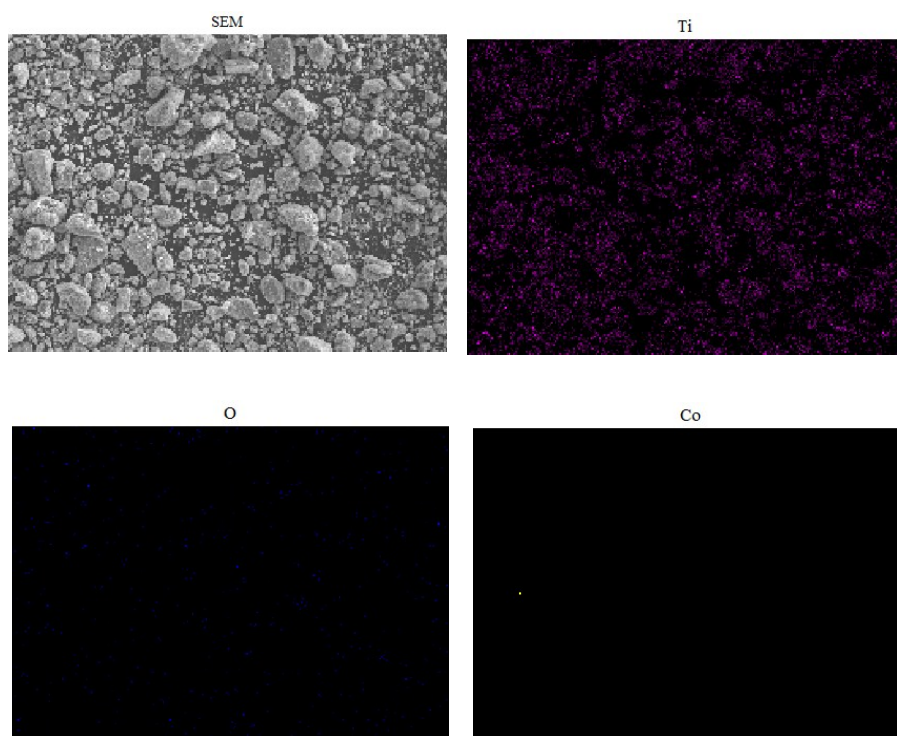

Fig. S2 Mapping of the as-prepared bTiO<sub>2</sub>.

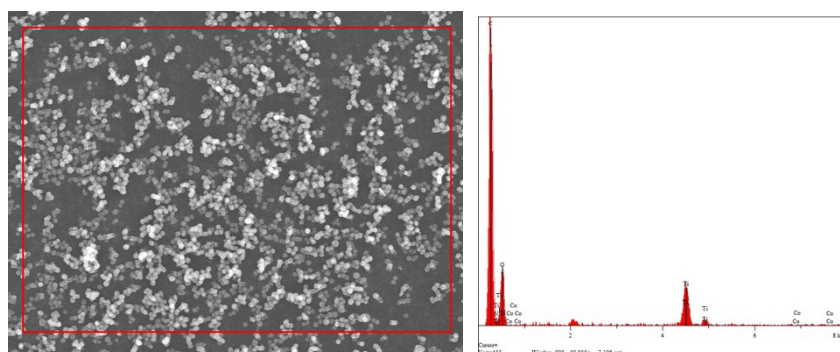

Fig. S3 SEM images of sTiO<sub>2</sub>(left) and Energy-dispersive X-ray spectroscopy (EDS) of the as-prepared sTiO<sub>2</sub>(right).

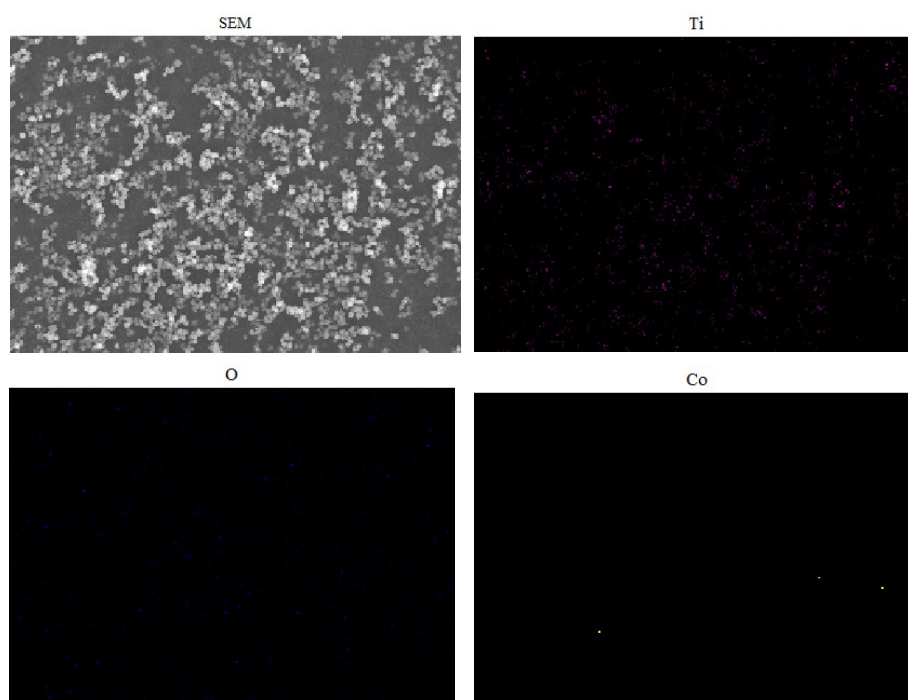

Fig. S4 Mapping of the as-prepared sTiO<sub>2</sub>.

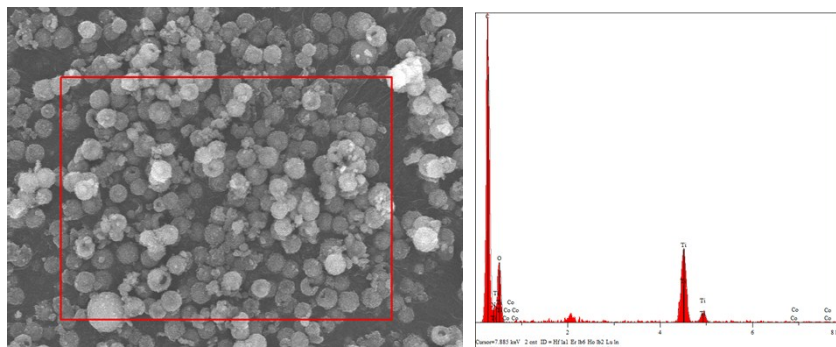

Fig. S5 SEM images of sTiO<sub>2</sub> sample after reaction(left) and Energy-dispersive X-ray spectroscopy (EDS) of the as-prepared sTiO<sub>2</sub> sample after reaction (right).

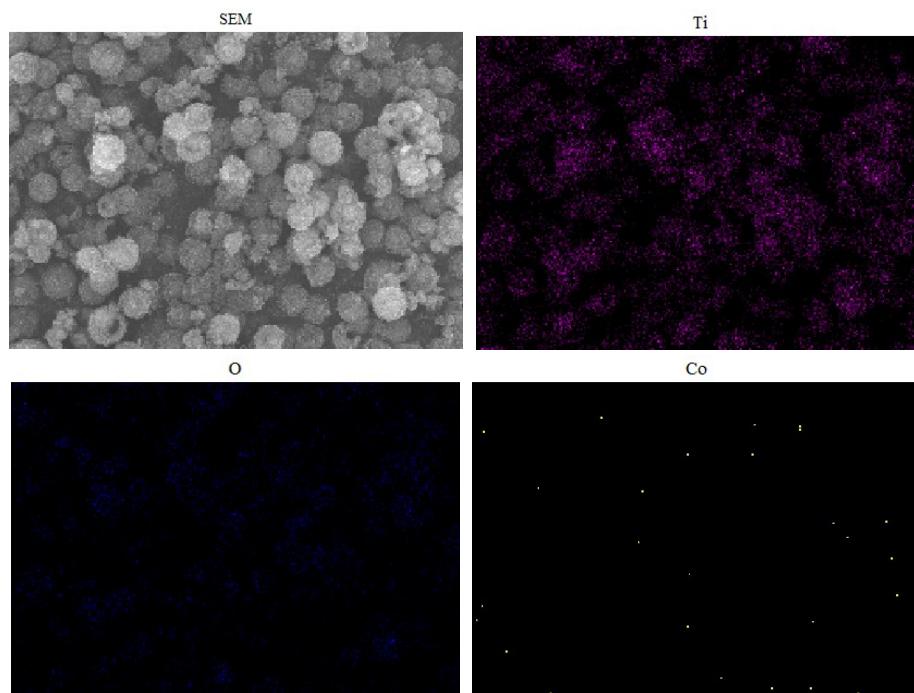

Fig. S6 Mapping of the as-prepared sTiO<sub>2</sub> sample after reaction.

Table S1 Element contents in bTiO<sub>2</sub> sample.

| Elt. | Line | Intensity (c/s) | Conc    | Units | Error 2-sig | MDL 3-sig |       |
|------|------|-----------------|---------|-------|-------------|-----------|-------|
| C    | Ka   | 28.77           | 4.982   | wt.%  | 0.852       | 0.945     |       |
| N    | Ka   | 0.27            | 0.226   | wt.%  | 0.612       | 0.708     |       |
| O    | Ka   | 42.95           | 28.825  | wt.%  | 3.138       | 2.402     |       |
| Ti   | Ka   | 876.42          | 65.205  | wt.%  | 1.417       | .394      |       |
| Co   | Ka   | 0.38            | 0.062   | wt.%  | 0.344       | 0.517     |       |
|      |      |                 | 100.000 | wt.%  |             |           | Total |

Table S2 Element contents in sTiO<sub>2</sub> sample.

| Elt. | Line | Intensity (c/s) | Conc    | Units | Error 2-sig | MDL 3-sig |       |
|------|------|-----------------|---------|-------|-------------|-----------|-------|
| C    | Ka   | 371.37          | 54.036  | wt.%  | 1.838       | 0.742     |       |
| N    | Ka   | 0.00            | 0.000   | wt.%  | 0.000       | 0.000     |       |
| O    | Ka   | 68.87           | 36.816  | wt.%  | 3.014       | 1.684     |       |
| Ti   | Ka   | 86.61           | 8.823   | wt.%  | 0.630       | 0.296     |       |
| Co   | Ka   | 1.53            | 0.325   | wt.%  | 0.305       | 0.391     |       |
|      |      |                 | 100.000 | wt.%  |             |           | Total |

Table S3 Element contents in sTiO<sub>2</sub> sample after reaction.

| Elt. | Line | Intensity (c/s) | Conc    | Units | Error 2-sig | MDL 3-sig |       |
|------|------|-----------------|---------|-------|-------------|-----------|-------|
| C    | Ka   | 384.93          | 52.819  | wt.%  | 1.722       | 0.403     |       |
| N    | Ka   | 0.00            | 0.000   | wt.%  | 0.000       | 0.000     |       |
| O    | Ka   | 56.53           | 31.677  | wt.%  | 2.801       | 1.328     |       |
| Ti   | Ka   | 165.14          | 15.261  | wt.%  | 0.771       | 0.268     |       |
| Co   | Ka   | 1.25            | 0.243   | wt.%  | 0.348       | 0.490     |       |
|      |      |                 | 100.000 | wt.%  |             |           | Total |
